# Supplementary material
Source: publisher figshare collection journal article supplement (https://gsapubs.figshare.com/ndownloader/files/23320694)
Supplement: Supplementary file 1 [file 23320694]

## 1 **Supplemental Material**

### 2 **DETAILED GLACIAL GEOMORPHOLOGY**

#### 3 *Drift on Lake Wellman and entrained in Hatherton Glacier*

4       The perennial ice cover of Lake Wellman displays numerous, ice-cored debris mounds,  
5 the most prominent of which is a large, blocky sandstone boulder resting atop an ice-cored talus  
6 skirt (Fig. S1). Close inspection of the two largest, conical debris mounds revealed gravel-sized  
7 or larger, angular sediment particles. The most prominent feature, a thick, hummocky ice-cored  
8 landform with multiple cross-cutting ridges and several meters of relief, is located between  
9 Hatherton Glacier and the lake. In addition, several similar but smaller mounds, as well as a  
10 variety of erratics, are melting out of Hatherton Glacier. Most erratics exhibit heavy staining,  
11 although there are also a limited number of moulded, faceted, and fresh clasts (Fig. S1). These  
12 latter erratics are almost entirely granite, diorite or sandstone.

13

#### 14 *Hatherton drift*

15       Hatherton drift extends ~1.8-2.0 km into the main valley from the present-day glacier  
16 terminus (860 m elevation) to a maximum observed elevation of 1000 m, although the limit is  
17 poorly defined (Figs. S1, S2). In general, the drift can be separated into two parts: 1) a thick  
18 deposit, ice-cored in places, immediately adjacent to the glacier on the south side of the field  
19 area, and 2) thin deposits outboard of Lake Wellman. In the former location, there are ice-cored  
20 conical mounds, similar to those on the lake. The most prominent feature is a sharp,  
21 discontinuous ridge (4 m relief), named Moraine 1 by Storey et al. (2010), that extends oblique  
22 to the present-day margin for 0.8 km and, because of its odd orientation, is not thought to be an  
23 ice-marginal feature. These thick deposits are matrix-supported with silty, gravelly sediment and

typically heavily weathered boulders. Some erratics exhibit staining over striations, however, there are also rare fresh, moulded and striated clasts.

In contrast to the area south of Lake Wellman, Hatherton drift distal to the lake is a thin sheet, typically only one boulder thick. Constructional landforms are limited to ice-contact terraces on a ridge separating the northern two lobes of the lake ice and to hummocky ridges, including one (Moraine D) located ~100 m above the present-day lake elevation. The drift commonly is composed of highly weathered erratics, particularly heavily stained dolerites, but also sandstones and a few granites. Both types of Hatherton drift contain abundant deposits of sub-fossil cyanobacteria.

#### *Britannia I drift*

Britannia I deposits occur outboard of Hatherton drift and extend as much as 3.3 km from the glacier terminus along the main valley axis (Figs. S1, S2). Here, the drift limit at 1130 m elevation (~270 m above present-day ice level at Lake Wellman) is marked by a distinct, laterally extensive ridge of openwork gravel to boulders (11 m of relief), termed Moraine 2 by Storey et al. (2010) (Figs. S1, S2). To the north and south of the moraine, the limit rises in elevation. To the north, the drift edge skirts the valley and then fades into colluvium; to the south, it can be traced nearly continuously to the north side of the saddle leading to Darwin Depression, a closed basin in the upper part of the westernmost valley in the Lake Wellman region. South of the saddle, the limit is visible as an ice-cored drift edge, which extends to the valley mouth and along the plateau adjacent to Hatherton Glacier between Lake Wellman and Lake Hendy. The maximum measured elevation of Britannia I drift in our field area occurs here

at ~1300 m. Overall, Britannia I drift is thin and commonly exposes windows of highly weathered drift from previous glaciations.

Britannia I drift displays numerous, laterally extensive recessional moraines. Moraines A, B, and C occur inboard of the limit at 1090, 1065, and 1030 m elevation, respectively, along the main axis of the valley (Fig. S2). These ridges are continuous for as much as ~0.9 km and typically are sharp-crested, narrow features with less than two meters of relief, although Moraine B has more than four meters of relief in places. Moraine A is marked only by an increase in boulder density. Several closely spaced moraine crests also occur near the lip of the Darwin Depression.

In general, Britannia I drift is composed of stained, angular clasts with only rare fresh erratics (Fig. S1). At the limit in the main valley, erratics consist of red-stained, slightly angular dolerite and brown-stained sandstone, with rare granite. Some sandstone clasts exhibit signs of exfoliation. However, there are sufficient unweathered or slightly weathered clasts to give the deposits a distinct gray color at the limit, compared to outboard deposits. Moreover, in contrast with the older drifts, abundant subfossil cyanobacteria are associated with Britannia I deposits. Cyanobacteria occur beneath boulders set into the surface of the drift.

Britannia I drift in Darwin Depression differs in morphology from that in the main valley. The eastern half of the basin contains hummocky, strongly weathered drift with fractured, heavily stained, generally rounded erratics. To the west, the hummocks give way to kame and kettle topography. Most kames are composed of loose, gravelly diamicton with a surface pavement of cobbles and gravel. The major landform on the basin floor is a sharp-crested, sinuous ridge (3-4 m relief) that trends east-west. Its hummocky crest suggests it that may be

ice-cored. The ridge is similar in size, shape, orientation and composition to Moraine 1 and contains ~5% moulded, faceted, and striated cobbles, some with staining over the striations.

Because the saddle separating Darwin Depression from the main valley is at only 1020 m elevation, Britannia I ice likely was thick enough to overtop the sill and flow into the basin. We base this inference on the fact that Britannia I drift extends to 1130 m elevation in the main valley, 2.5 km north of the lake, and the limit rises toward Darwin Depression. In addition, degraded lateral moraines associated with Britannia I drift slope down into the basin from the saddle, indicating ice flow from the main valley. Hummocky, kame and kettle topography that is prevalent in the basin can be explained by stagnation of an ice mass that became separated from Hatherton Glacier during recession. An alternate interpretation for the hummocky topography is that it was formed by a lake-ice conveyor (Hendy et al., 2000).

Overall, our mapped Britannia I highstand of Hatherton Glacier closely matches the Britannia limit of Bockheim et al. (1989). However, Bockheim et al. (1989) could not distinguish between Britannia I and the older Britannia II drift in the Lake Wellman region and inferred that their mapped Britannia limit likely represented the Britannia II extent rather than Britannia I as we propose here. Based on our more detailed mapping, on comparison with other sites alongside Hatherton Glacier, and on weathering characteristics, we were able to identify a Britannia II drift limit outboard of the Britannia I limit. The Britannia II limit is marked by a distinct clast-rich ridge at ~1245 m elevation in the main valley <0.3 km distal to the Britannia I drift edge. The ridge crest is sharp (2 m relief), covered with large boulders, continuous for ~1.0 km, and composed of primarily slightly stained, exfoliating sandstone. Britannia II drift has been shown elsewhere along Hatherton Glacier to date to the penultimate glaciation (Joy et al., 2014). As this age is consistent with the observed degree of weathering, we adopt that age here

for Britannia II drift. Deposits distal to Britannia II are more strongly weathered and relate to older Danum and Isca drifts (Bockheim et al., 1989). We did not find cyanobacterial mats associated with any drift older than Britannia I.

### *Glaciolacustrine Deposits*

The locations of former lakes associated with Britannia and Hatherton drifts can be identified in many cases by surface texture and morphology. Typically, such sites show erratics slightly set into a smooth sandy, gravely surface. In some locations, tightly interlocking cobbles and boulders have been pressed into flat pavement surfaces (Fig. S2, S3). *In situ* sub-fossil cyanobacterial mats are preserved commonly in sorted silt, sand, and gravel sediment beneath and around clasts. In addition, relict shorelines are etched into Britannia I drift in several places (Fig. S3). Most of these abandoned lake deposits and landforms occur on surfaces that slope down toward the present-day ice margin, and therefore a thicker Hatherton Glacier must have existed in order to dam the water to these levels.

## **RADIOCARBON RESULTS AND INTERPRETATION**

Forty-five radiocarbon dates of sub-fossil cyanobacteria mats were collected along two primary transects, one between Lake Wellman and the Darwin Depression and the second along the main valley axis (Transects A and B, respectively; Table S1, Fig. S2). Eleven samples along Transect A yielded ages ranging from ~8400-6500 yr BP. Three samples from Darwin Depression – two from the sinuous ridge crest and one from the basin floor – range from  $8110 \pm 80$  to  $8400 \pm 50$  yr BP. These samples require an ice-dammed lake capable of spilling over the saddle at 1020 m elevation. One sample within the moraine complex on the saddle above the

depression dates to  $7880 \pm 150$  yr BP (OS-111893). A prominent lake basin with relict shorelines occurs immediately proximal to these moraines and produced five ages of  $7760 \pm 80$  to  $8670 \pm 120$  yr BP, with four clustering tightly between  $7760 \pm 80$  and  $7870 \pm 80$  yr BP. We consider the oldest age to be an outlier. This shoreline grades into the sill leading to the Darwin Depression and may reflect a time when water level had just dropped below the sill. A sample collected less than 20 m elevation below these shorelines produced an age of  $6570 \pm 80$  yr BP (OS-111169). Cyanobacteria collected along the transect at ~50 m above Lake Wellman in a basin west of Moraine 1 dated to  $3310 \pm 70$  yr BP (OS-110172).

We dated 33 samples along Transect B in the main valley (Fig. S2, Table S1). Three samples in a small basin dammed against the distal slope of Moraine 2 at the Britannia I limit produced a mean age of  $9520 \pm 50$  yr BP, which we take to be the best estimate of the timing of the local glacial maximum. Six samples immediately proximal to Moraine 2 range from  $8690 \pm 100$  to  $11,220 \pm 70$  yr BP. Another sample, proximal to the Britannia I limit in the northeast region of the main valley, yielded an age of  $8370 \pm 40$  yr BP. The remainder of the samples associated with Britannia I drift occur at lower elevations and fall between ~13,000 yr BP and 6000 yr BP. Two samples distal to Moraine A are  $10,350 \pm 100$  and  $10,320 \pm 90$  yr BP. Between Moraines A and B, three samples in the northern part of the valley range from  $7250 \pm 80$  and  $8250 \pm 230$  yr BP in age. Farther south, two samples between the same two moraines are  $12,980 \pm 140$  and  $12,620 \pm 100$  yr BP. At lower elevation distal to Moraine C, four samples date from  $6120 \pm 180$  to  $6440 \pm 50$  yr BP. Two samples from the crest of the moraine itself cluster tightly between  $6360 \pm 50$  and  $6530 \pm 210$  yr BP, and one sample immediately proximal to the moraine dates to  $6440 \pm 140$  yr BP (OS-111899). Eleven radiocarbon samples at even lower elevations in Hatherton drift range from ~5960-2500 yr BP. The two most distal samples within Hatherton

drift are  $5960 \pm 40$  and  $5300 \pm 20$  yr BP (OS-111163 and OS-111164). Six samples bracketing the lower-elevation Moraine D range from  $4850 \pm 70$  to  $4360 \pm 70$  yr BP. The lowest sample, collected at ~20 m above present-day Lake Wellman, produced an age of  $2810 \pm 40$  yr BP (OS-117593). We did not collect samples closer to the lake due to snow cover.

We propose the following conceptual model for the origin of the cyanobacteria mats in glaciolacustrine deposits high above the present-day lake (Fig. S4). Because of the valley slope, most lakes in Lake Wellman valley must be dammed against the margin of Hatherton Glacier. Thus, the position and elevation of the lakes are controlled by the extent and elevation of the glacier. As the glacier advances up the slope, it overrides deposits from its former lakes. We suspect that rare deposits formed during the advance were preserved close to the Britannia drift limit and are reflected by a cluster of anomalously old ages in the main valley that decrease in age with increasing elevation. Most of our samples, however, reflect recession of Hatherton Glacier down the slope toward its present-day position. As the glacier receded, the lake followed the glacier (Fig. S4), leading the cyanobacterial mats to display the decreasing radiocarbon ages with decreasing elevation that characterizes our dataset. Moreover, each sample of cyanobacteria affords information on 1) minimum ice level needed to dam the water body and 2) minimum age for deglaciation of the specific site of the sample.

#### *Small vs. Large Lakes*

We interpret our data as indicating a series of small, short-lived ice-marginal lakes, rather than as fluctuations of a single long-lived large lake dammed by a distant ice margin. Although it is possible that a single large lake could have filled the valley at some time in the past, we do not see evidence of this. As benthic mats can live at a range of water depths, we would expect to see

numerous radiocarbon dates of the same age at a variety of locations and elevations, if a large lake filled the valley. Cyanobacteria of different ages would be in close spatial juxtaposition. Instead, the radiocarbon ages show a strong pattern of decreasing age with decreasing elevation, consistent with small ice-dammed lakes following a retreating ice margin downslope.

In our opinion, another compelling argument in favor of small lakes closely associated with the ice margin rather than a single large lake is the fact that the cyanobacterial mats are only associated with Britannia I and Hatherton drifts. It is highly unlikely that a large lake dammed by a distant ice margin would coincidentally end exactly at the Britannia I limit.

## **COSMOGENIC NUCLIDE ANALYSES AND EXPOSURE AGES**

Cosmogenic  $^{10}\text{Be}$  and  $^{26}\text{Al}$  analyses of samples analyzed for this study are given in Tables S2 and S3. Exposure ages are calculated with an online calculator (<http://hess.ess.washington.edu>) using the default CRONUS calibration data set (Borchers et al., 2016; Balco et al., 2008).

Samples for exposure dating were collected during the 2013-14 field season and come from a mix of kilogram-size cobbles and larger boulders. Most are from granite erratics, a rock type that does not crop out in the glacier catchment upstream. We collected from rocks showing patches of glacial smoothing, blunted edges, or other evidence of glacial transport, confirming that there has been minimal erosion since deposition. We did not sample from lee slopes or rocks in the lee of larger boulders, to avoid the possibility of cover by drift snow.

When sampling in Antarctica, we normally target isolated erratics perched on bedrock or on ancient, compacted, geomorphically-stable surfaces. We typically avoid moraines, which are commonly ice-cored and show obvious evidence of collapse and accompanying disturbance.



This was not always possible at Lake Wellman, where there are few bedrock outcrops below the Britannia-I depositional limit, and much of the valley floor is covered with comparatively thick recessional drift. Instead, where possible, we sampled from the edges of discontinuous patches of Britannia I and Hatherton drifts, where these deposits were thin enough to reveal underlying, older surfaces, and targeted perched rocks and boulders undisturbed since deposition. In such cases, we compared the degree of weathering on the top and bottom of the rocks to confirm that they had not been overturned. Despite these precautions, 4 of the 7 samples from Britannia I recessional deposits gave exposure ages substantially older than the radiocarbon ages of nearby cyanobacteria mats, confirming that the majority of clasts in this deposit are recycled (*cf.* Storey et al., 2010). Lacking other material to date the maximum Britannia I advance, we also sampled from the moraine that marks the Britannia I limit at two sites, both west and northwest of Lake Wellman (Fig. S2). This moraine was originally ice-cored (and remains so in places), and rocks at the crest may have rotated as it collapsed. We therefore targeted cobble-sized rocks which would receive the same cosmic-ray dose regardless of orientation, as well as rocks with different degrees of weathering on the top and bottom surfaces, indicating a consistent orientation during exposure. Only one of these 8 samples, gave an age close to that of nearby radiocarbon samples (13-HAT-031-LW); the remainder range from ~19-65 ka and appear to be pre-exposed and recycled.

Sample elevations were derived from drift-corrected barometric altimeters, referenced to a network of control points established with a geodetic GPS receiver. Elevation accuracy is typically  $\pm 3$ -5 m based on repeat measurements during this and other Antarctic field seasons. Topographic shielding of samples was calculated from vertically oriented, full-sky fisheye photographs.

Beryllium and aluminum were extracted and purified for isotopic analysis at the University of Washington Cosmogenic Nuclide Laboratory using established procedures (<http://depts.washington.edu/cosmolab/chem.shtml>). We crushed and sieved samples and purified quartz from the 250-500  $\mu\text{m}$  or 500-850  $\mu\text{m}$  fractions using a combination of density and surfactant separations and etching with dilute HF (Kohl & Nishiizumi, 1992). After quartz dissolution we purified Be and Al by column chromatography (Ditchburn and Whitehead, 1994). We measured Be isotope ratios at the Lawrence Livermore National Laboratory Center for Accelerator Mass Spectrometry (LLNL-CAMS). Isotope ratios were normalized to the ICN 01-5-4 Be standard, also referred to as KNSTD-3110, assuming a  $^{10}\text{Be}/^9\text{Be}$  value of  $2.851 \times 10^{-12}$  (Nishiizumi et al., 2007). Results shown in Table S3 have been corrected for  $^{10}\text{Be}$  blanks of  $\sim 1\text{--}2 \times 10^4$  atoms, less than 1% of the total  $^{10}\text{Be}$  measured except in the case of the young sample 13-HAT-049a-LW ( $7.2 \pm 2.2\%$ ). We measured Al isotope ratios at PRIME Lab, where Al is analyzed by injecting molecular  $\text{AlO}^-$  and a gas-filled magnet is used to suppress interference by  $^{26}\text{Mg}$  ions. In terms of ions counted, the sensitivity of  $^{26}\text{Al}$  measurements is within a factor of two of  $^{10}\text{Be}$  measurements at LLNL-CAMS, and final uncertainties of the  $^{10}\text{Be}$  and  $^{26}\text{Al}$  concentrations are comparable.

Most of the  $^{10}\text{Be}$  measurements for this project were made at LLNL-CAMS during 2011-2014. Analyses of UW cathodes containing ICN Be standard material run concurrently with these measurements scattered by significantly more than their reported uncertainties, indicating a source of analytical error not accounted for in the data processing and reporting. To incorporate this additional source of uncertainty, we have increased the error assigned to unknown samples run with the UW standards as described below.

In each accelerator run we analyzed 1-11 cathodes containing 250-270 micrograms of the ICN-01-5-4, ICN-01-5-3 and ICN-01-6-1 reference standards (Nishiizumi et al., 2007) prepared from purchased solutions. These were run openly (not blind) and results processed as unknowns alongside regular samples. Isotope ratios for 65 of these UW-KNSTD standards run in this period ranged from  $0.904 \pm 0.010$  to  $1.129 \pm 0.010$  of their expected values. In all AMS runs UW standard cathodes produced less accurate results than LLNL internal standard cathodes containing the same reference materials. For each run with more than one UW-KNSTD standard analysis we calculated the dispersion and bias of the UW standard cathodes. Reduced  $\chi^2$  values ranged from 3.2 to 185; bias of the analyses from  $-8.3 \pm 1.0 \%$  to  $+5.1 \pm 3.4\%$ . The high  $\chi^2$  values indicate a source of error in the analysis of UW cathodes not accounted for in their reported uncertainties. We estimate this additional error  $\sigma_E$  for each run as the amount which, when added to the reported errors in quadrature, brings the reduced  $\chi^2$  of the UW KNSTD data to 1:

For a set of n UW-KNSTD analyses with measured  $^{10}\text{Be}/^9\text{Be}$  ratios  $R_{m,i}$ , normalized to their standard values  $R_{std}$ , and reported errors  $\sigma_{m,i}$ , the reduced  $\chi^2$  value is given by:

$$\chi^2/(n-1) = 1/(n-1) \sum_{i=1}^n \frac{(R_{m,i}/R_{std} - 1)^2}{(\sigma_{m,i}/R_{std})^2}$$

and the additional error required to bring chi-squared to 1,  $\sigma_E$ , is given by:

$$1 = 1/(n-1) \sum_{i=1}^n \frac{(R_{m,i}/R_{std} - 1)^2}{(\sigma_{m,i}/R_{std})^2 + \sigma_E^2}$$

For AMS  $^{10}\text{Be}$  runs in 2011-2014 this additional error ranges from zero up to 9.1%. For the samples in this data set an additional error of 2.2% was applied to 3 of the 17 samples. The remainder were either analyzed in runs with a single UW KNSTD, or in runs in early 2015 in which  $\chi^2/(n-1)$  of the UW standard analyses was  $< 1$ . For the 3 samples assigned additional error, bias in accompanying standard analyses was  $-0.8 \pm 2.8\%$  and has not been corrected.

## SUPPLEMENTAL REFERENCES

- Balco, G., Stone, J. O., Lifton, N. A., and Dunai, T. J. (2008). A complete and easily accessible means of calculating surface exposure ages or erosion rates from  $^{10}\text{Be}$  and  $^{26}\text{Al}$  measurements. *Quaternary Geochronology*, 3, 174-195.
- Bockheim, J.G., Wilson, S.C., Denton, G.H., Andersen, B.G., and Stuiver, M., 1989, Late Quaternary ice-surface fluctuations of Hatherton Glacier, Transantarctic Mountains: *Quaternary Research*, v. 31, p. 229–254.
- Borchers, B., Marrero, S., Balco, G., Caffee, M., Goehring, B., Lifton, N., Nishiizumi, K., Phillips, F., Schaefer, J. and Stone, J. (2016). Geological calibration of spallation production rates in the CRONUS-Earth project. *Quaternary Geochronology*, 31, 188-198.
- Ditchburn, R.G. and Whitehead, N.E. (1994). The separation of  $^{10}\text{Be}$  from silicates. 3rd Workshop South Pacific Environ. Radioact. Assoc., pp. 4-7.
- Hendy, C.H., Sadler, A.J., Denton, G.H., and Hall, B.L., 2000, Proglacial lake-ice conveyors: A new mechanism for deposition of drift in polar environments: *Geografiska Annaler Series A*, v. 82, p. 249–270.

268 Joy, K., Fink, D., Storey, B.C., and Atkins, C., 2014, A 2 million year glacial chronology of the  
269 Hatherton Glacier, Antarctica and implications for the size of the East Antarctic Ice Sheet  
270 at the last glacial maximum: *Quaternary Science Reviews*, v. 83, p. 46–57.

271 Kohl, C. P., and Nishiizumi, K. (1992). Chemical isolation of quartz for measurement of in-situ-  
272 produced cosmogenic nuclides. *Geochimica et Cosmochimica Acta*, 56, 3583-3587.

273 Nishiizumi, K., Imamura, M., Caffee, M. W., Southon, J. R., Finkel, R. C., and McAninch, J.  
274 (2007). Absolute calibration of  $^{10}\text{Be}$  AMS standards. *Nuclear Instruments and Methods in*  
275 *Physics Research Section B: Beam Interactions with Materials and Atoms*, 258, 403-413.

276 Storey, B.C., Fink, D., Hood, D., Joy, K., Schulmeister, J., Riger-Kusk, M, and Stevens, M.I.,  
277 2010. Cosmogenic nuclide exposure age constraints on the glacial history of the Lake  
278 Wellman area, Darwin Mountains, Antarctica: *Antarctic Science*, v. 22, p. 603-618.

279

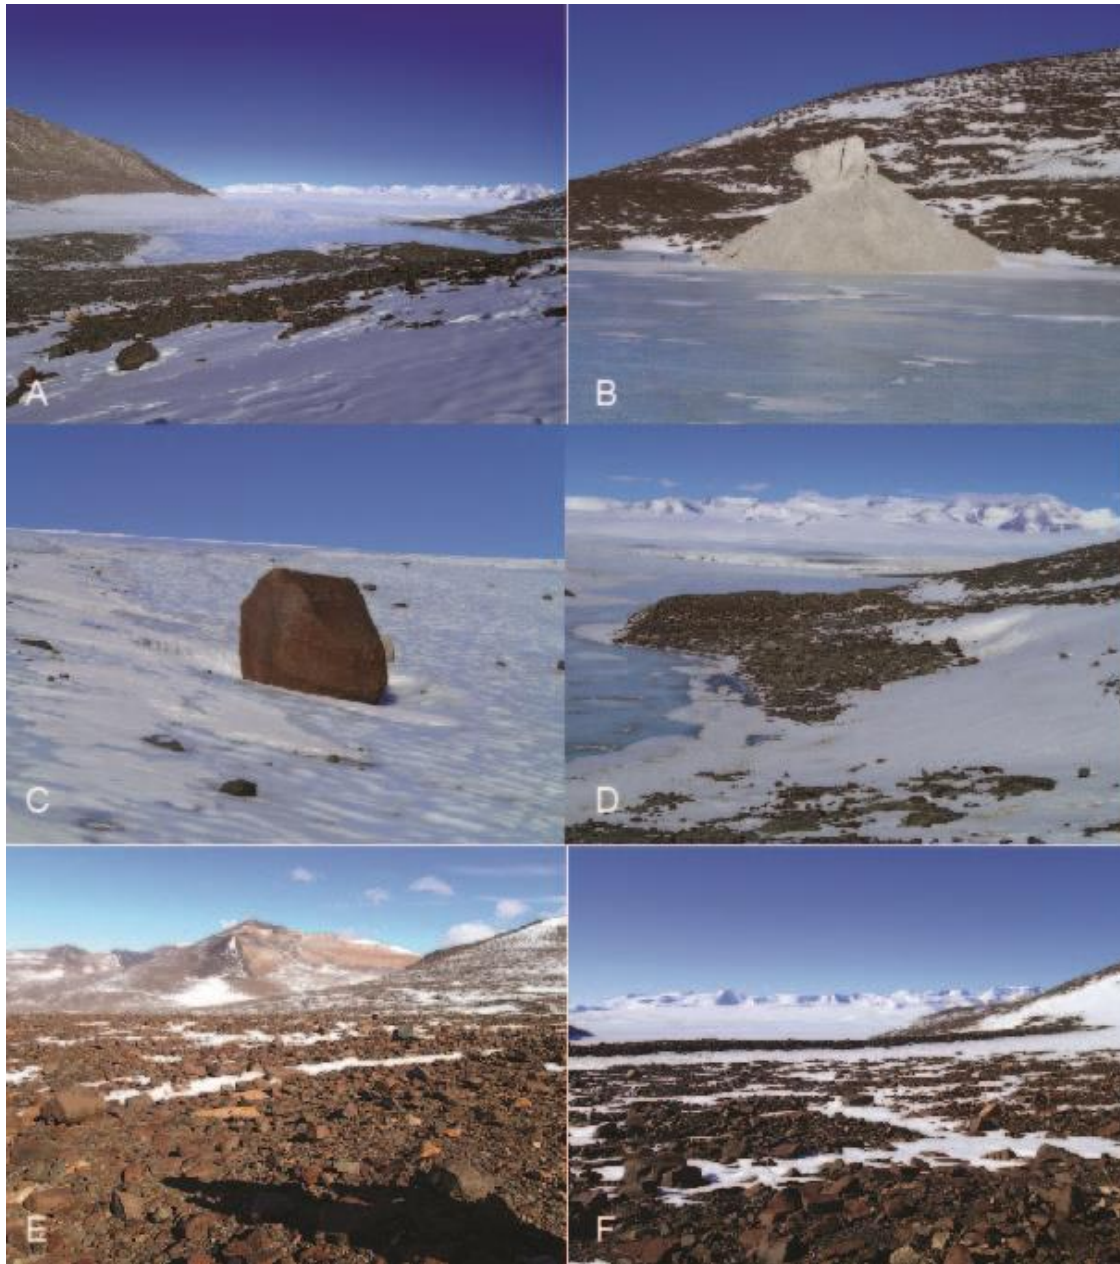

280

281

282

283

284

285

286

287

Figure S1. A. View of Lake Wellman and Hatherton Glacier, Transantarctic Mountains. B. Ice-cored debris cone (~6 m high) on the surface of Lake Wellman. C. Weathered dolerite erratic (~1.2 m high) emerging from the present-day glacier. D. Hatherton drift adjacent to Lake Wellman, including Moraine 1. E. Weathered Britannia I drift surface. F. Britannia I drift limit, marked here by a prominent moraine (about half a km long in this photograph). View is of the distal moraine slope toward the east.



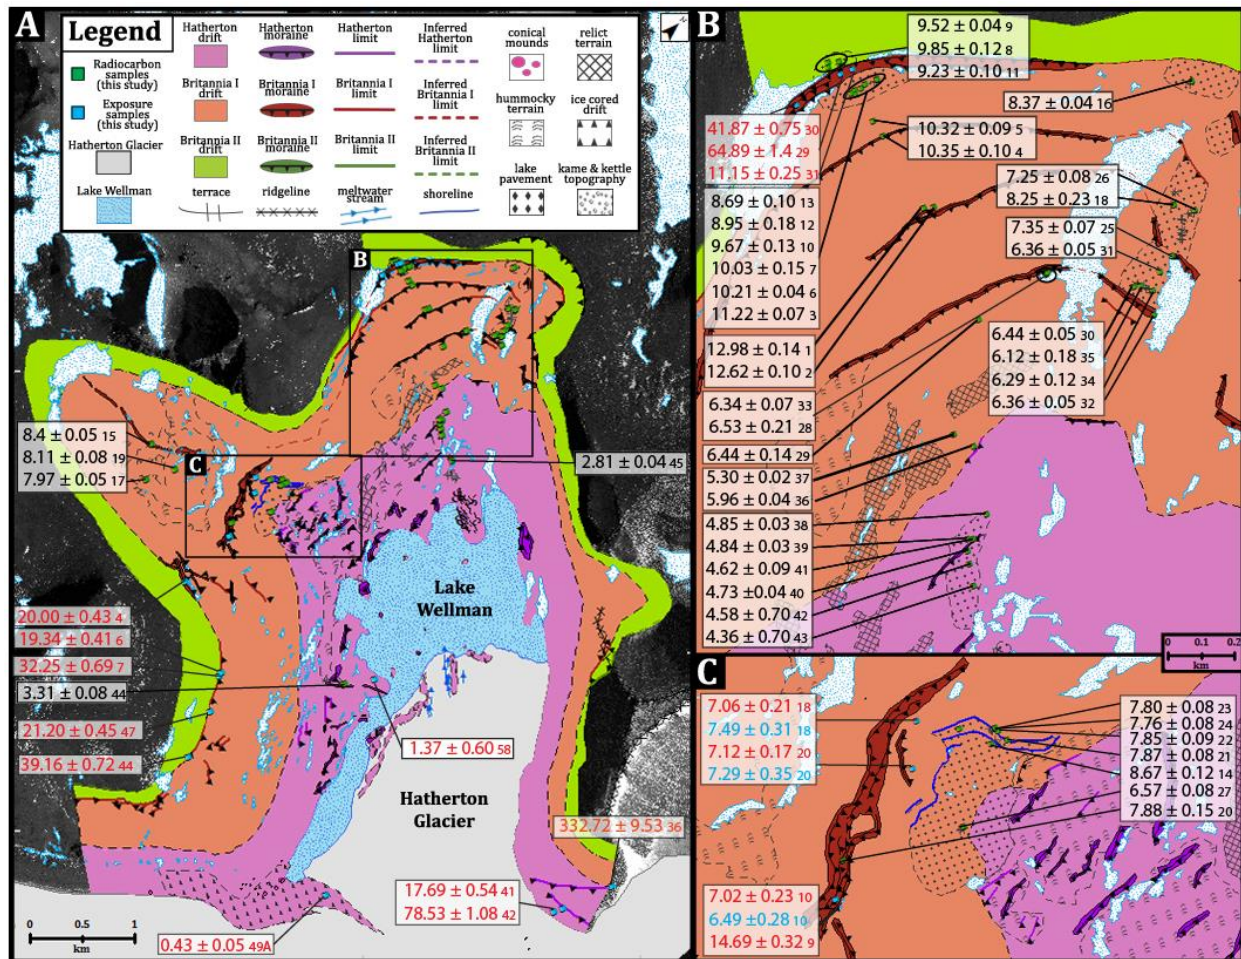

Figure S2. Surficial geomorphology and geochronologic data, Lake Wellman region. Map shows the principal surficial deposits, as well as the radiocarbon (black),  $^{10}\text{Be}$  (red) and  $^{26}\text{Al}$  (blue) ages in thousands of years. Small numbers following radiocarbon dates are keyed to the first column of Table S1. Similar numbers following the beryllium and aluminum ages can be found in the sample names in Table S2. Boxed letters by moraines denote the informal moraine names.

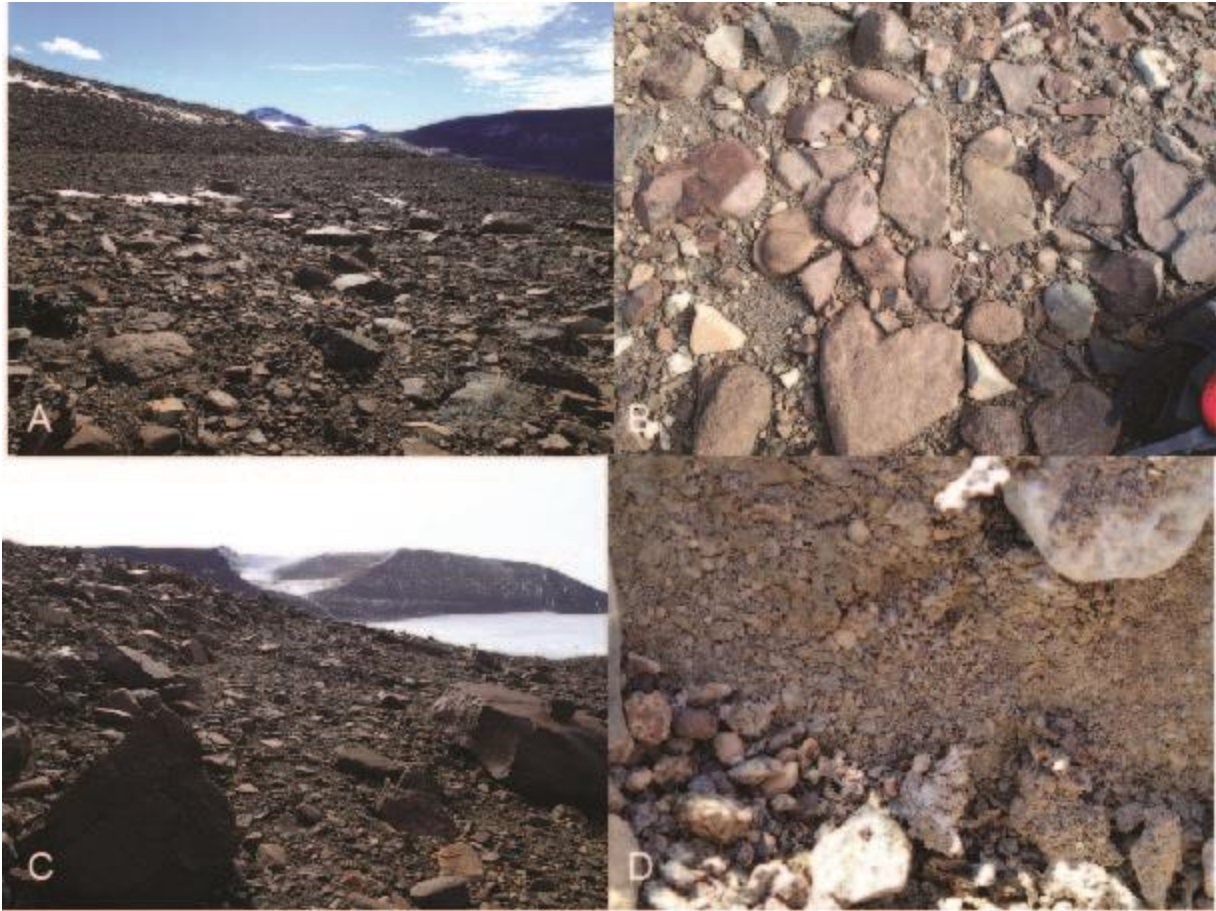

294

295 Figure S3. A. Shorelines etched into Britannia I drift in Lake Wellman valley. The lake that  
 296 formed these shorelines must have been dammed by ice to the right of the photograph. B. Lake-  
 297 ice boulder pavement. Nearshore areas of lakes in this region are characterized by interlocking,  
 298 well-embedded boulders and cobbles. Cyanobacteria are abundant beneath these pavements. We  
 299 propose that such pavements form in the moat zone where seasonal freezing leads to ice pressure  
 300 on the lake-bottom clasts. C. Shoreline notch. Present-day Hatherton Glacier can be seen in the  
 301 distance below to the right. The ice is ~150 m lower in elevation than the relict shoreline. D.  
 302 Cyanobacterial mat preserved in sediments; field of view is ~20 cm.



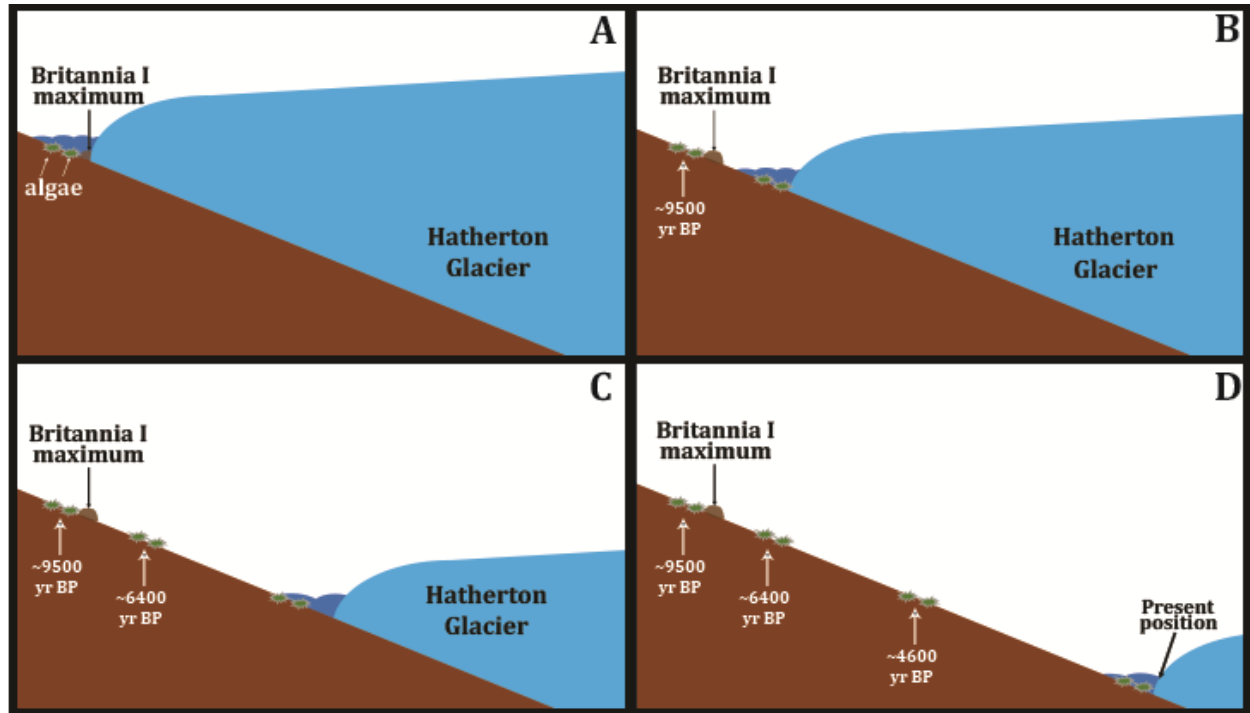

304

305 Figure S4. Schematic diagram of the relationship between the benthic cyanobacterial mats that  
 306 grew in former ice-marginal lakes and past elevations of Hatherton Glacier for the Lake  
 307 Wellman region. At the local LGM highstand, a lake was dammed against the margin of the  
 308 glacier. Throughout recession, small, ice-marginal lakes followed the glacier terminus as it  
 309 receded down the slope. Ancient cyanobacteria associated with these lakes, were stranded on the  
 310 hillsides during this process and preserved in places beneath boulders and sediments.  
 311 Radiocarbon ages become younger with decreasing elevation. The reverse process can occur  
 312 during advance, although lacustrine sediments and associated cyanobacteria may be preserved in  
 313 only select locations.

314

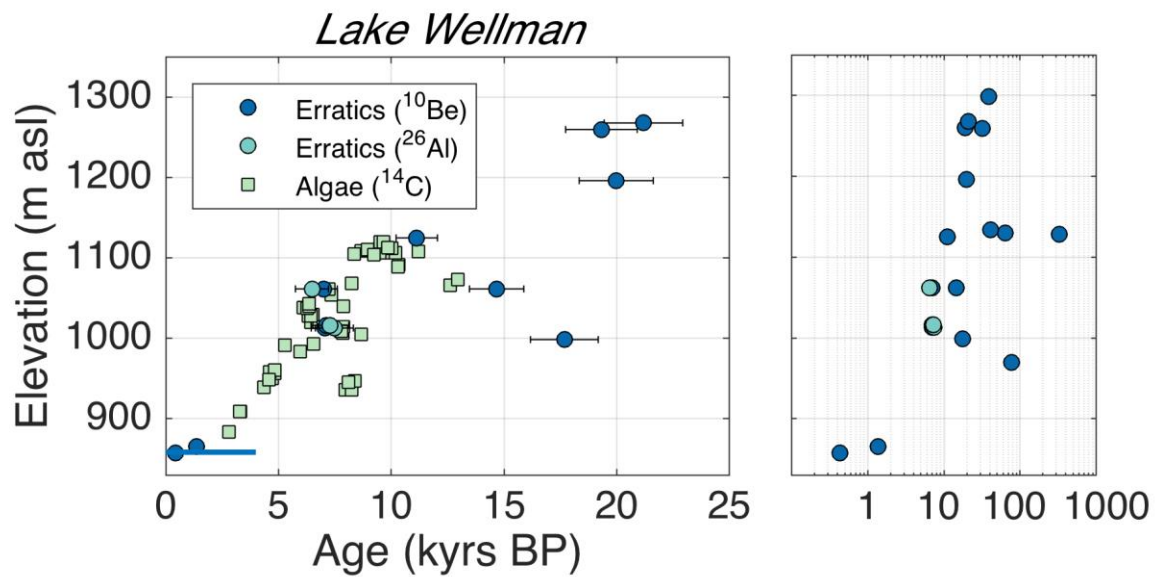

315

316 Figure S5. Age vs. elevation for both radiocarbon and cosmogenic isotope samples. The left

317 panel shows all ages and associated errors. The right panel shows only cosmogenic isotope

318 samples. Note the logarithmic scale. We caution that the age vs. elevation format provides only

319 one means of examining the data and does not account for significant elevation variation along

320 single limits that should yield internally consistent ages.

TABLE S1. RADIOCARBON DATA FOR SUBFOSSIL CYANOBACTERIA

| No. | Lab Number | Latitude  | Longitude | Elevation (m) | $\delta^{13}\text{C}$ | $^{14}\text{C}$ age (BP) | 1 $\sigma$ | Cal. age (BP) | 1 $\sigma$ |
|-----|------------|-----------|-----------|---------------|-----------------------|--------------------------|------------|---------------|------------|
| 1   | OS-117544  | -79.89168 | 156.78500 | 1073          | -2.34                 | 11150                    | 60         | 12980         | 140        |
| 2   | OS-111165  | -79.89144 | 156.78596 | 1066          | -3.42                 | 10650                    | 60         | 12620         | 100        |
| 3   | OS-111168  | -79.89011 | 156.76419 | 1108          | -1.25                 | 9800                     | 50         | 11220         | 70         |
| 4   | OS-111166  | -79.89112 | 156.77162 | 1091          | -0.42                 | 9210                     | 40         | 10350         | 100        |
| 5   | OS-117545  | -79.89104 | 156.76873 | 1089          | -0.87                 | 9140                     | 40         | 10320         | 90         |
| 6   | OS-111167  | -79.89045 | 156.76332 | 1106          | -0.76                 | 9040                     | 40         | 10210         | 40         |
| 7   | OS-117548  | -79.89088 | 156.76346 | 1112          | -0.58                 | 8880                     | 40         | 10030         | 150        |
| 8   | OS-111155  | -79.89091 | 156.75700 | 1113          | -1.03                 | 8840                     | 40         | 9850          | 120        |
| 9   | OS-110168  | -79.89079 | 156.75648 | 1120          | -1.75                 | 8560                     | 40         | 9520          | 40         |
| 10  | OS-110170  | -79.89064 | 156.76332 | 1106          | -1.01                 | 8680                     | 55         | 9670          | 130        |
| 11  | OS-111156  | -79.89056 | 156.75764 | 1104          | -5.06                 | 8260                     | 35         | 9230          | 100        |
| 12  | OS-117509  | -79.89080 | 156.76295 | 1110          | -2.85                 | 8070                     | 50         | 8950          | 180        |
| 13  | OS-117546  | -79.89094 | 156.76283 | 1109          | -4.64                 | 7880                     | 35         | 8690          | 100        |
| 14  | OS-117512  | -79.91129 | 156.79936 | 1005          | -5.80                 | 7860                     | 50         | 8670          | 120        |
| 15  | OS-117550  | -79.91710 | 156.74017 | 947           | -2.03                 | 7600                     | 35         | 8400          | 50         |
| 16  | OS-117540  | -79.88348 | 156.80006 | 1105          | -3.79                 | 7560                     | 35         | 8370          | 40         |
| 17  | OS-110174  | -79.91720 | 156.75764 | 936           | -2.38                 | 7130                     | 40         | 7970          | 50         |
| 18  | OS-117637  | -79.88631 | 156.81294 | 1068          | -4.61                 | 7480                     | 120        | 8250          | 230        |
| 19  | OS-117594  | -79.91958 | 156.75159 | 945           | -2.64                 | 7320                     | 35         | 8110          | 80         |
| 20  | OS-111893  | -79.91676 | 156.79649 | 1040          | -8.03                 | 7080                     | 75         | 7880          | 150        |
| 21  | OS-111160  | -79.91089 | 156.80061 | 1014          | -2.89                 | 7040                     | 40         | 7870          | 80         |
| 22  | OS-111158  | -79.91090 | 156.79849 | 1006          | -4.33                 | 7010                     | 35         | 7850          | 90         |
| 23  | OS-111161  | -79.91168 | 156.79391 | 1009          | -4.82                 | 6980                     | 30         | 7800          | 80         |
| 24  | OS-111159  | -79.91090 | 156.79787 | 1009          | -5.33                 | 6930                     | 35         | 7760          | 80         |
| 25  | OS-117542  | -79.88738 | 156.81883 | 1054          | -4.41                 | 6410                     | 30         | 7350          | 70         |
| 26  | OS-117511  | -79.88597 | 156.81592 | 1061          | -3.33                 | 6340                     | 40         | 7250          | 80         |
| 27  | OS-111169  | -79.91355 | 156.80611 | 993           | -4.32                 | 5760                     | 30         | 6570          | 80         |
| 28  | OS-111916  | -79.89040 | 156.80692 | 1029          | -5.52                 | 5740                     | 100        | 6530          | 210        |
| 29  | OS-111899  | -79.89274 | 156.80466 | 1020          | -5.20                 | 5650                     | 80         | 6440          | 140        |
| 30  | OS-111157  | -79.88879 | 156.81822 | 1028          | -3.27                 | 5640                     | 30         | 6440          | 50         |
| 31  | OS-117541  | -79.88893 | 156.82394 | 1040          | -3.54                 | 5600                     | 25         | 6360          | 50         |
| 32  | OS-117543  | -79.88792 | 156.81943 | 1043          | -2.78                 | 5600                     | 25         | 6360          | 50         |
| 33  | OS-117510  | -79.89035 | 156.80685 | 1028          | -2.97                 | 5540                     | 45         | 6340          | 70         |
| 34  | OS-111900  | -79.88846 | 156.82085 | 1037          | -3.83                 | 5460                     | 65         | 6290          | 120        |
| 35  | OS-111911  | -79.88863 | 156.81898 | 1038          | -4.72                 | 5370                     | 90         | 6120          | 180        |
| 36  | OS-111163  | -79.89536 | 156.81944 | 983           | -6.47                 | 5220                     | 25         | 5960          | 40         |
| 37  | OS-111164  | -79.89556 | 156.81560 | 991           | -6.58                 | 4570                     | 25         | 5300          | 20         |
| 38  | OS-111162  | -79.89645 | 156.82907 | 960           | -2.99                 | 4280                     | 30         | 4850          | 30         |
| 39  | OS-117513  | -79.89735 | 156.82990 | 956           | -2.61                 | 4240                     | 35         | 4840          | 30         |
| 40  | OS-117507  | -79.89759 | 156.83139 | 950           | n.d.                  | 4210                     | 30         | 4730          | 40         |

| No. | Lab<br>Number | Latitude  | Longitude | Elevation<br>(m) | $\delta^{13}\text{C}$ | $^{14}\text{C}$ age<br>(BP) | 1 $\sigma$ | Cal. age<br>(BP) | 1 $\sigma$ |
|-----|---------------|-----------|-----------|------------------|-----------------------|-----------------------------|------------|------------------|------------|
| 41  | OS-117508     | -79.89724 | 156.83049 | 958              | -4.42                 | 4110                        | 30         | 4620             | 90         |
| 42  | OS-117505     | -79.89780 | 156.83310 | 948              | -1.77                 | 4090                        | 30         | 4580             | 70         |
| 43  | OS-117549     | -79.89813 | 156.83624 | 939              | -3.91                 | 3920                        | 20         | 4360             | 70         |
| 44  | OS-110172     | -79.91910 | 156.89320 | 909              | -2.01                 | 3110                        | 30         | 3310             | 80         |
| 45  | OS-117593     | -79.89903 | 156.84862 | 883              | -3.01                 | 2720                        | 20         | 2810             | 40         |

TABLE S2. METADATA FOR COSMOGENIC ISOTOPE SAMPLES

| Sample         | Latitude  | Longitude | Elevation<br>(m) | Thickness<br>(cm) | Density<br>(g/cm <sup>3</sup> ) | Shielding |
|----------------|-----------|-----------|------------------|-------------------|---------------------------------|-----------|
| 13-HAT-004-LW  | -79.92333 | 156.80100 | 1196             | 4                 | 2.5                             | 0.995338  |
| 13-HAT-006-LW  | -79.92666 | 156.84691 | 1260             | 4                 | 2.5                             | 0.999572  |
| 13-HAT-007-LW  | -79.92646 | 156.84644 | 1259             | 4                 | 2.5                             | 0.999549  |
| 13-HAT-009-LW  | -79.91775 | 156.80047 | 1061             | 5                 | 2.65                            | 0.997257  |
| 13-HAT-010-LW  | -79.9177  | 156.80041 | 1061             | 4                 | 2.65                            | 0.997506  |
| 13-HAT-018-LW  | -79.91243 | 156.78796 | 1013             | 4.5               | 2.65                            | 0.993860  |
| 13-HAT-020-LW  | -79.91346 | 156.79340 | 1016             | 4                 | 2.65                            | 0.996814  |
| 13-HAT-029-LW  | -79.89079 | 156.75929 | 1130             | 4                 | 2.5                             | 0.995794  |
| 13-HAT-030-LW  | -79.89234 | 156.75795 | 1133             | 4                 | 2.5                             | 0.996208  |
| 13-HAT-031-LW  | -79.89044 | 156.75995 | 1125             | 4                 | 2.5                             | 0.996517  |
| 13-HAT-036-LW  | -79.91424 | 157.05614 | 1128             | 6                 | 2.65                            | 0.988984  |
| 13-HAT-041-LW  | -79.91864 | 157.04753 | 998              | 5                 | 2.5                             | 0.996531  |
| 13-HAT-042-LW  | -79.91943 | 157.04586 | 969              | 2                 | 2.5                             | 0.996962  |
| 13-HAT-044-LW  | -79.93334 | 156.86501 | 1299             | 4                 | 2.5                             | 0.999266  |
| 13-HAT-047-LW  | -79.92941 | 156.85678 | 1268             | 4                 | 2.5                             | 0.999203  |
| 13-HAT-049A-LW | -79.93291 | 156.96286 | 857              | 6                 | 2.5                             | 0.997605  |
| 13-HAT-058-LW  | -79.91696 | 156.90154 | 865              | 6.75              | 2.65                            | 0.998110  |

TABLE S3. CONCENTRATION DATA AND AGES FOR COSMOGENIC SAMPLES

| Sample         | <sup>10</sup> Be<br>(atoms/g) | 1σ      | <sup>10</sup> Be age<br>(years) | 1σ   | <sup>26</sup> Al<br>(atoms/g) | 1σ     | <sup>26</sup> Al age<br>(years) | 1σ   |
|----------------|-------------------------------|---------|---------------------------------|------|-------------------------------|--------|---------------------------------|------|
| 13-HAT-004-LW  | 305,023                       | 6498    | 19,996                          | 428  | 0                             | 0      | n.d.                            | n.d. |
| 13-HAT-006-LW  | 312,372                       | 6651    | 19,340                          | 414  | 0                             | 0      | n.d.                            | n.d. |
| 13-HAT-007-LW  | 518,847                       | 11,033  | 32,251                          | 691  | 0                             | 0      | n.d.                            | n.d. |
| 13-HAT-009-LW  | 198,651                       | 4244    | 14,688                          | 315  | 0                             | 0      | n.d.                            | n.d. |
| 13-HAT-010-LW  | 95,881                        | 3158    | 7017                            | 231  | 620,306                       | 26,774 | 6490                            | 281  |
| 13-HAT-018-LW  | 91,769                        | 2753    | 7056                            | 212  | 680,958                       | 28,420 | 7488                            | 314  |
| 13-HAT-020-LW  | 93,477                        | 2229    | 7118                            | 170  | 669,309                       | 31,824 | 7288                            | 348  |
| 13-HAT-029-LW  | 926,219                       | 19,609  | 64,893                          | 1396 | 0                             | 0      | n.d.                            | n.d. |
| 13-HAT-030-LW  | 603,135                       | 10,616  | 41,867                          | 745  | 0                             | 0      | n.d.                            | n.d. |
| 13-HAT-031-LW  | 160,696                       | 3547    | 11,145                          | 247  | 0                             | 0      | n.d.                            | n.d. |
| 13-HAT-036-LW  | 4,330,080                     | 114,012 | 332,720                         | 9531 | 0                             | 0      | n.d.                            | n.d. |
| 13-HAT-041-LW  | 226,851                       | 6874    | 17,693                          | 538  | 0                             | 0      | n.d.                            | n.d. |
| 13-HAT-042-LW  | 990,095                       | 13,287  | 78,528                          | 1075 | 0                             | 0      | n.d.                            | n.d. |
| 13-HAT-044-LW  | 649,555                       | 11,892  | 39,156                          | 724  | 0                             | 0      | n.d.                            | n.d. |
| 13-HAT-047-LW  | 344,478                       | 7193    | 21,203                          | 445  | 0                             | 0      | n.d.                            | n.d. |
| 13-HAT-049A-LW | 4900                          | 506     | 433                             | 45   | 0                             | 0      | n.d.                            | n.d. |
| 13-HAT-058-LW  | 15,454                        | 679     | 1368                            | 60   | 0                             | 0      | n.d.                            | n.d. |
